# Supplementary material for: Tunable graphene oxide for the low-fouling electrochemical sensing of uric acid in human serum
Source: Royal Society of Chemistry journal article supplement (doi:10.1039/d3an00291h), 2023-01-01
Supplement: d3an00291h1.pdf [file d3an00291h1.pdf]

# Tunable Graphene Oxide for Low-Fouling Electrochemical Sensing of UA in Human Serum

Gang Li <sup>a</sup>, Chunying Xu <sup>a,\*</sup>, Hui Xu <sup>b</sup>, Liju Gan <sup>a</sup>, Kai Sun <sup>c</sup>, Baiqing Yuan <sup>a,\*</sup>

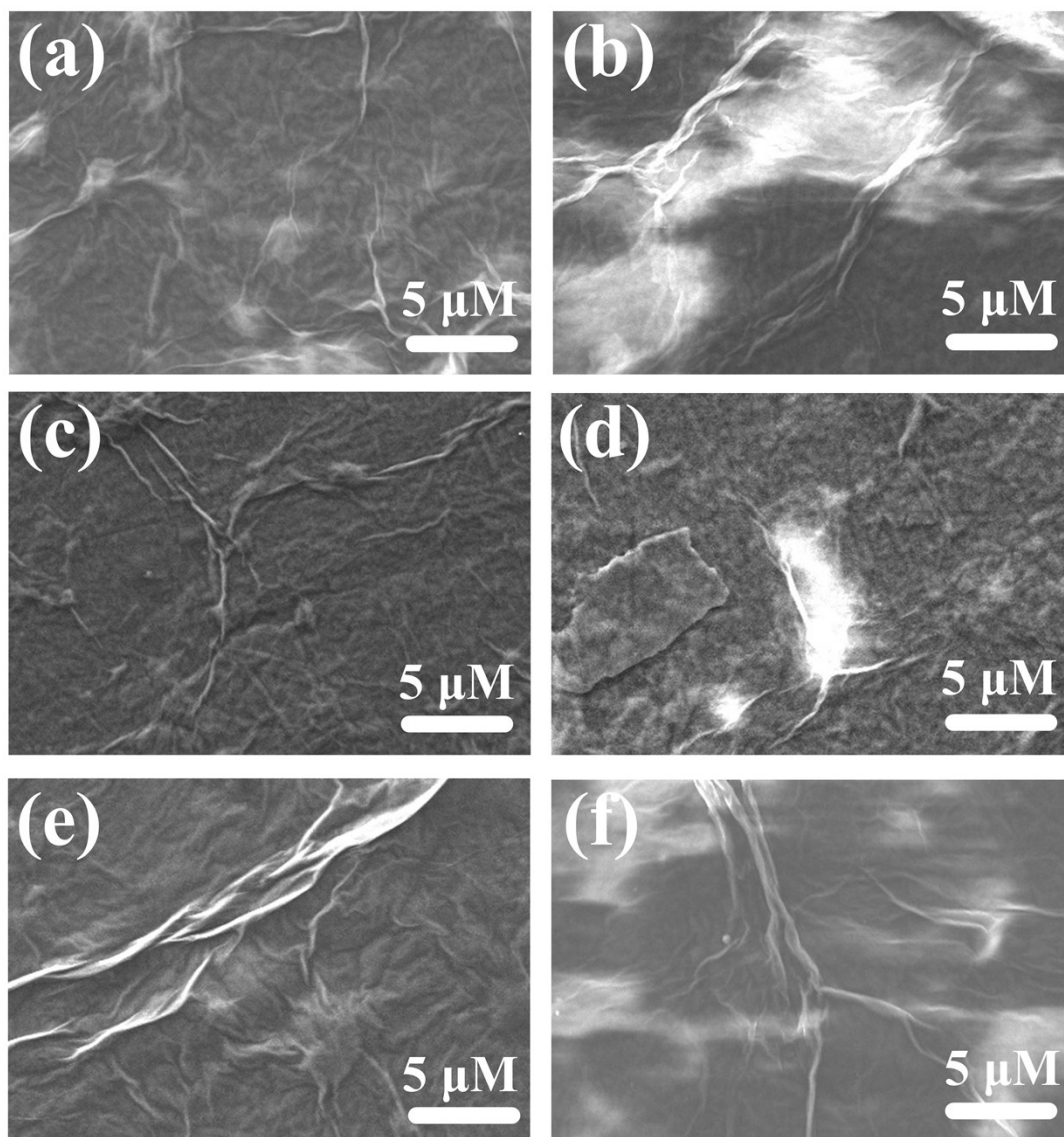

**Fig. S-1** SEM images of (a) GO/GCE, (b) GO-BSA/GCE, (c) GO<sub>0.75</sub>/GCE, (d) GO<sub>0.75</sub>-BSA/GCE, (e) EHGO/GCE, and (f) EHGO-BSA/GCE.

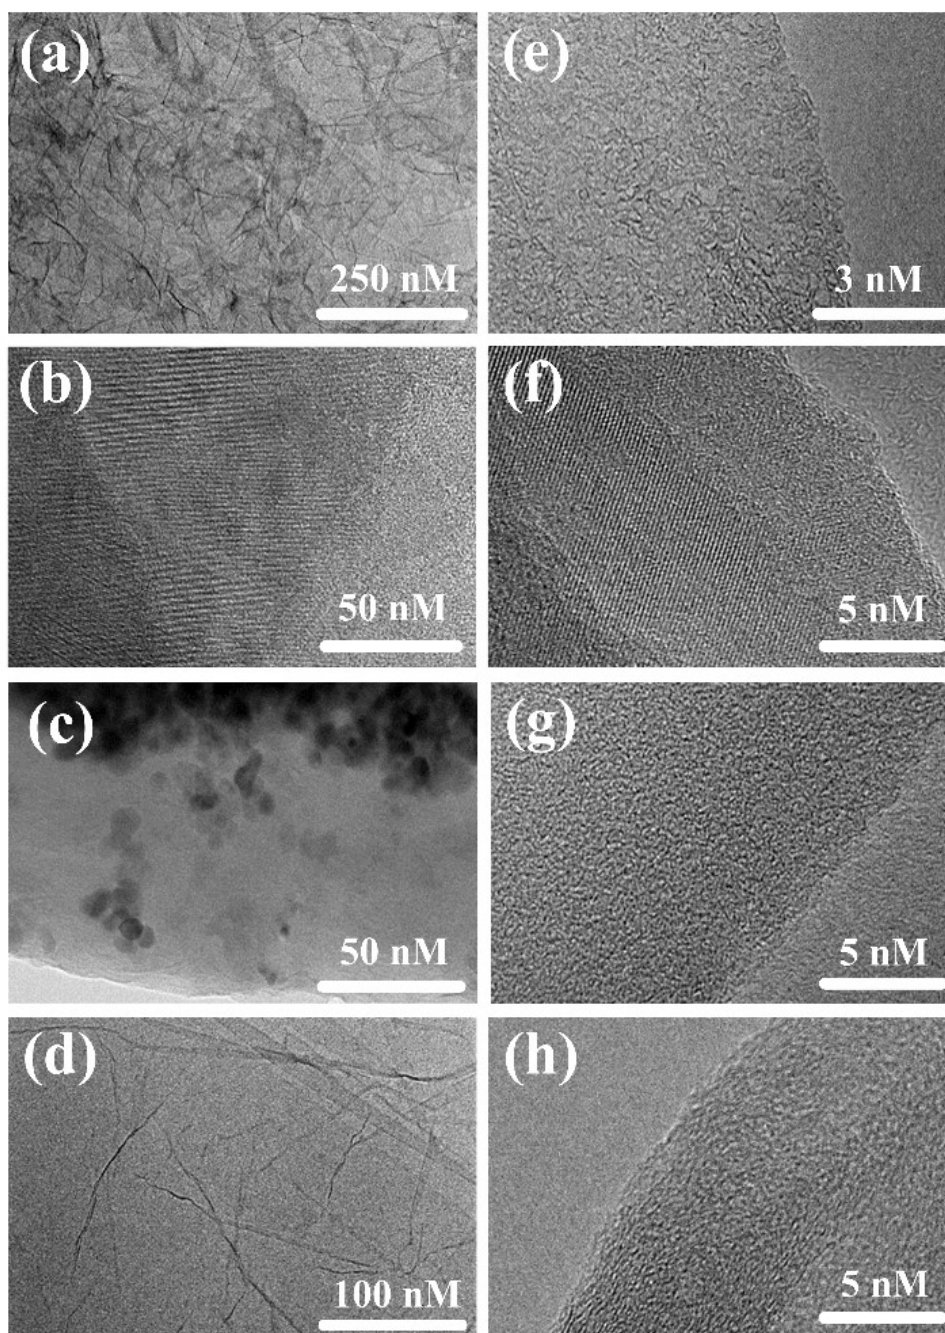

**Fig. S-2** TEM and HRTEM images of (a, e) GO/GCE, (b, f) GO-BSA/GCE, (c, g) GO<sub>0.75</sub>/GCE, (d, h) EHGO/GCE.

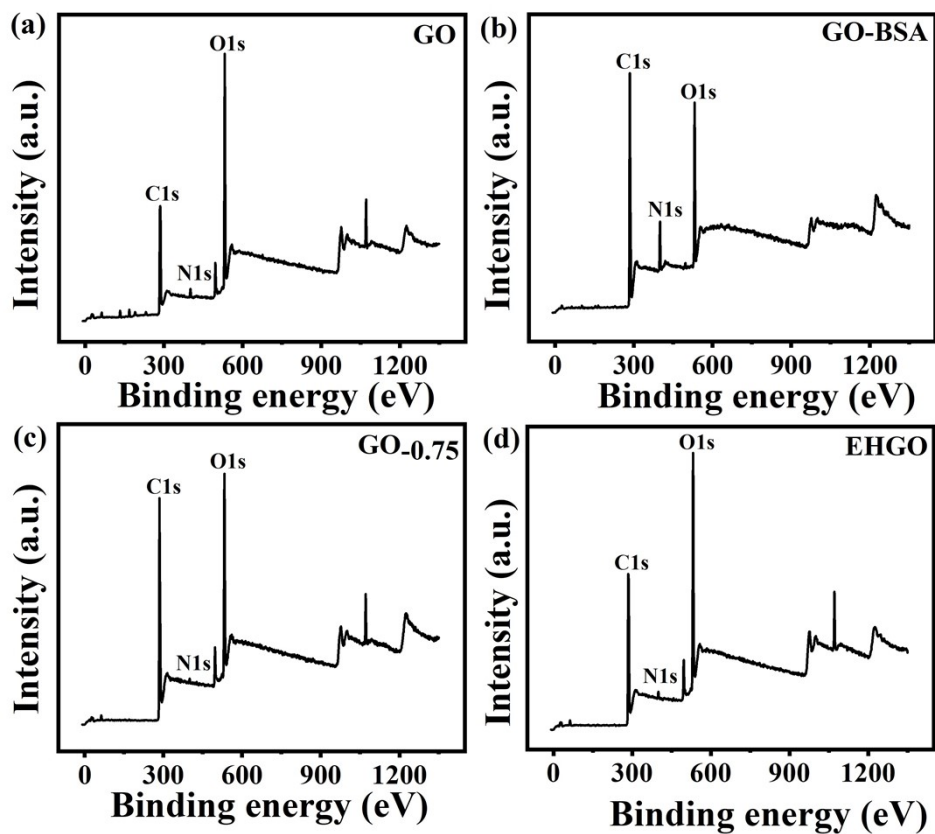

Fig. S-3 XPS survey spectrum of (a) GO, (b) GO-BSA, (c) GO<sub>0.75</sub>, (d) EHGO.

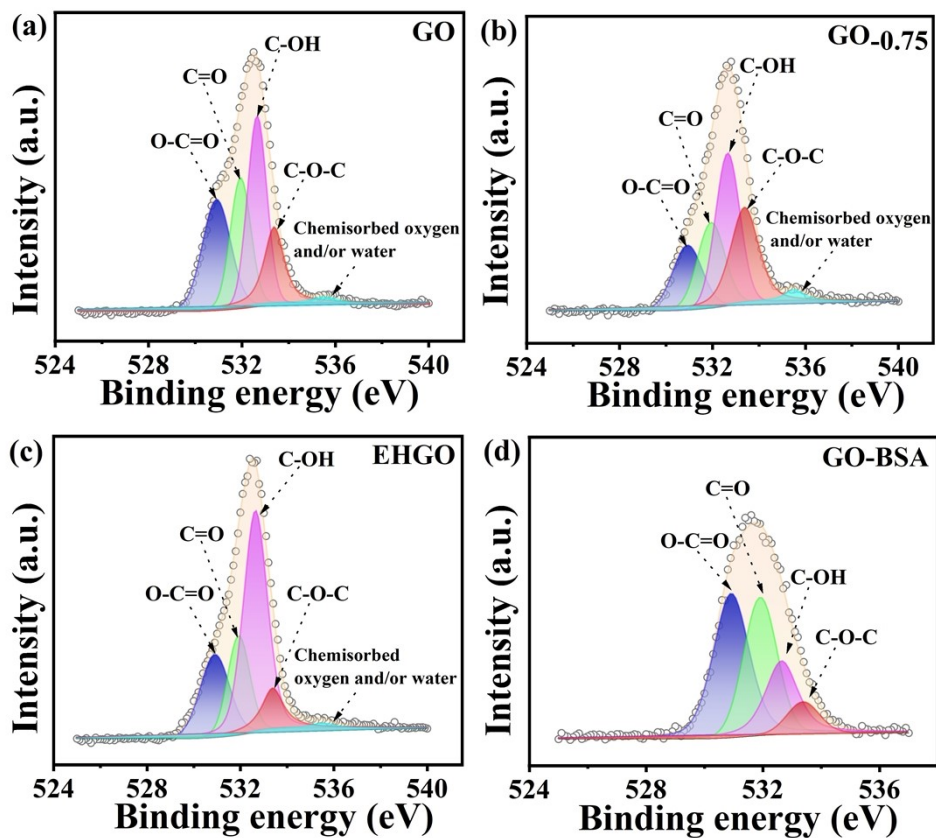

Fig. S-4 O1s XPS spectra of (a) GO, (b) GO<sub>0.75</sub>, (c) EHGO, (d) GO-BSA.

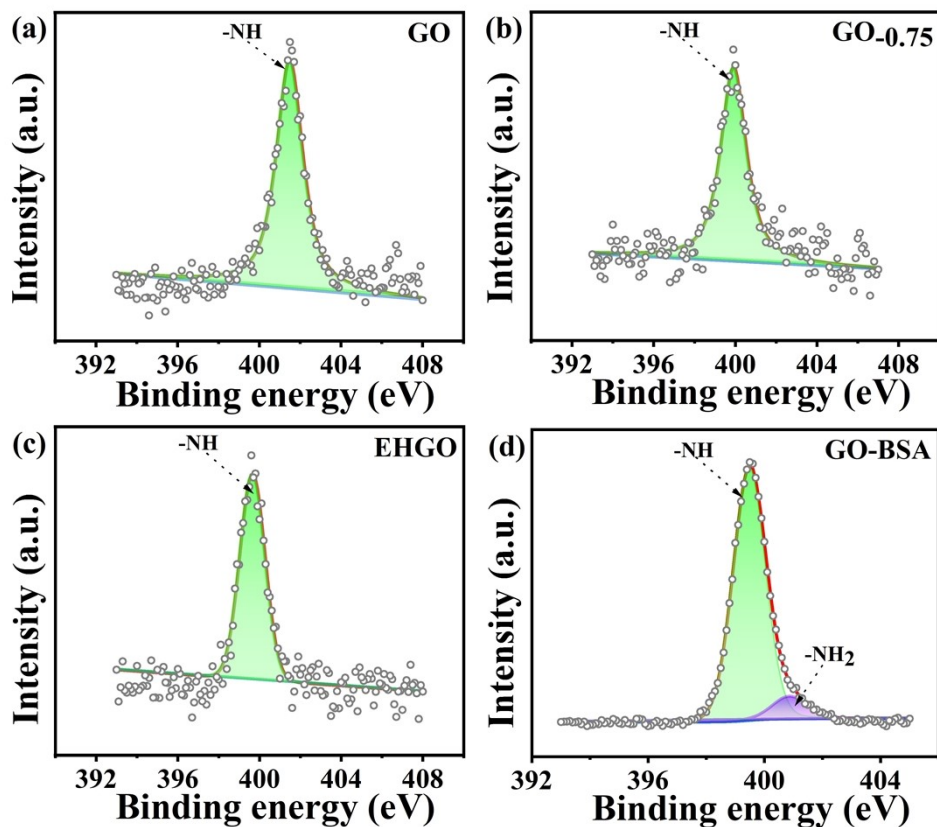

Fig. S-5 N1s XPS spectra of (a) GO, (b) GO<sub>0.75</sub>, (c) EHGO, (e) GO-BSA.

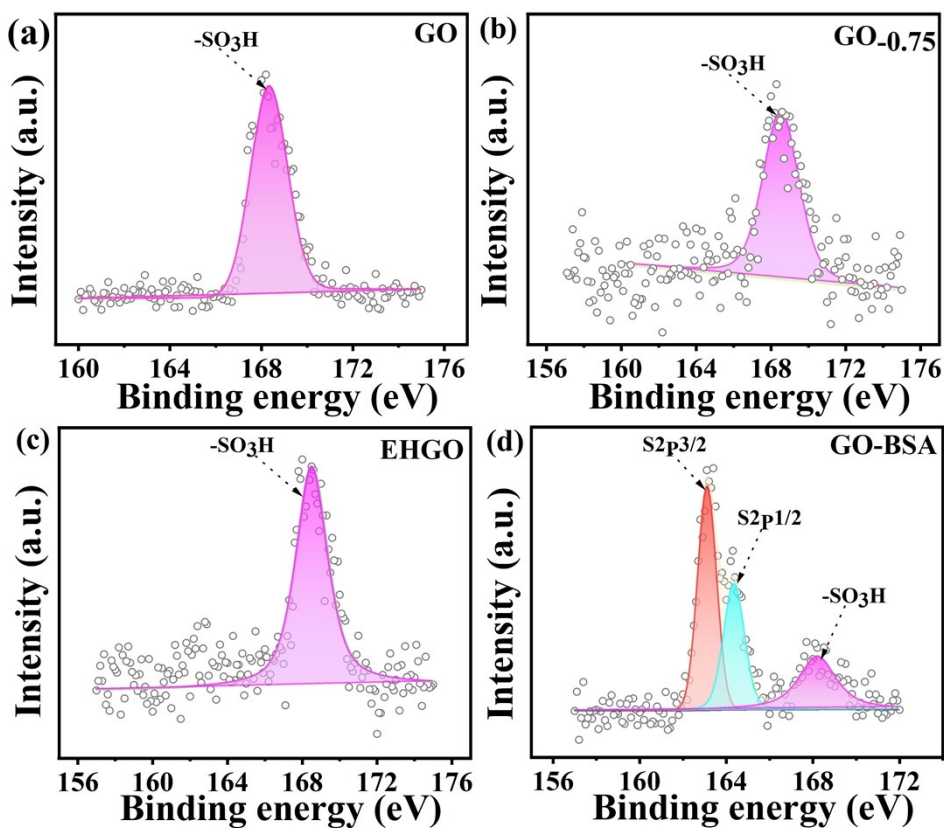

Fig. S-6 S2p XPS spectra of (a) GO, (b) GO<sub>0.75</sub>, (c) EHGO, (e) GO-BSA.

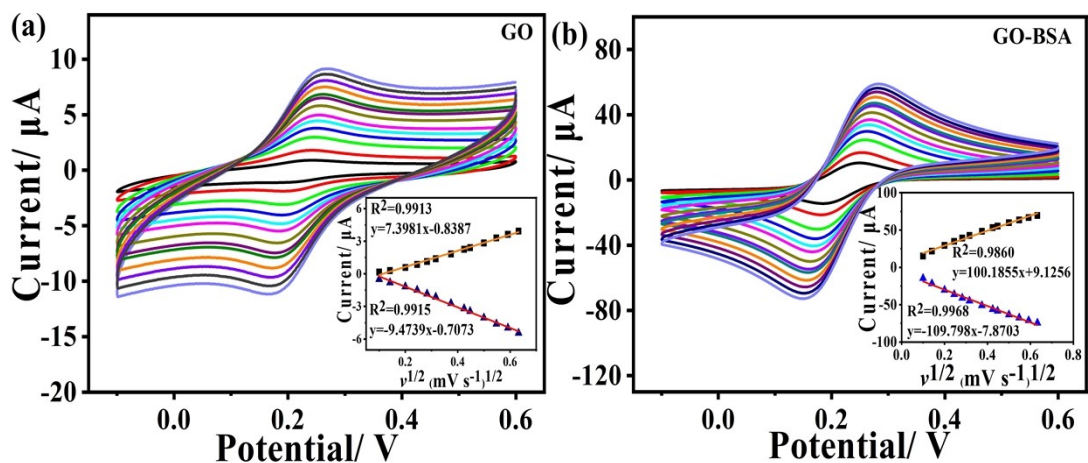

**Fig. S-7** CVs of GO/GCE and GO-BSA/GCE in 0.1 M KCl solution in the presence of 5 mM  $K_3Fe(CN)_6$  at different scan rates. Inset: the linear plot of anodic and cathodic peak currents versus the square root of scan rate.

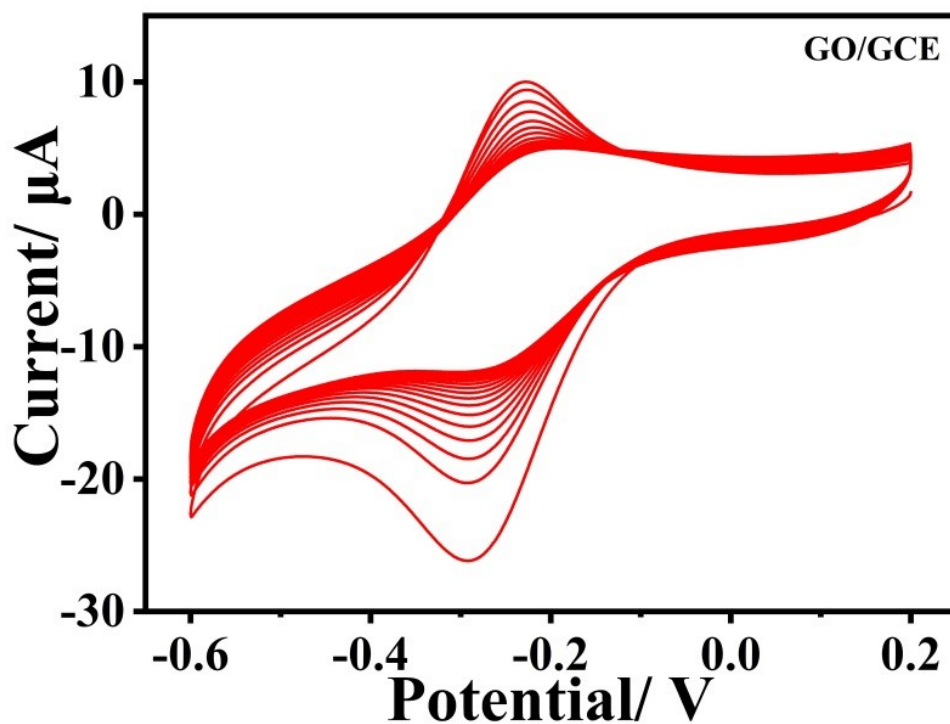

**Fig. S-8** CVs of GO/GCE in 0.1 M PBS (pH = 7.0) at a scan rate of 25 mV s<sup>-1</sup> for 30 cycles **after scanning in 5 mM  $Ru(NH_3)_6Cl_3$ .**



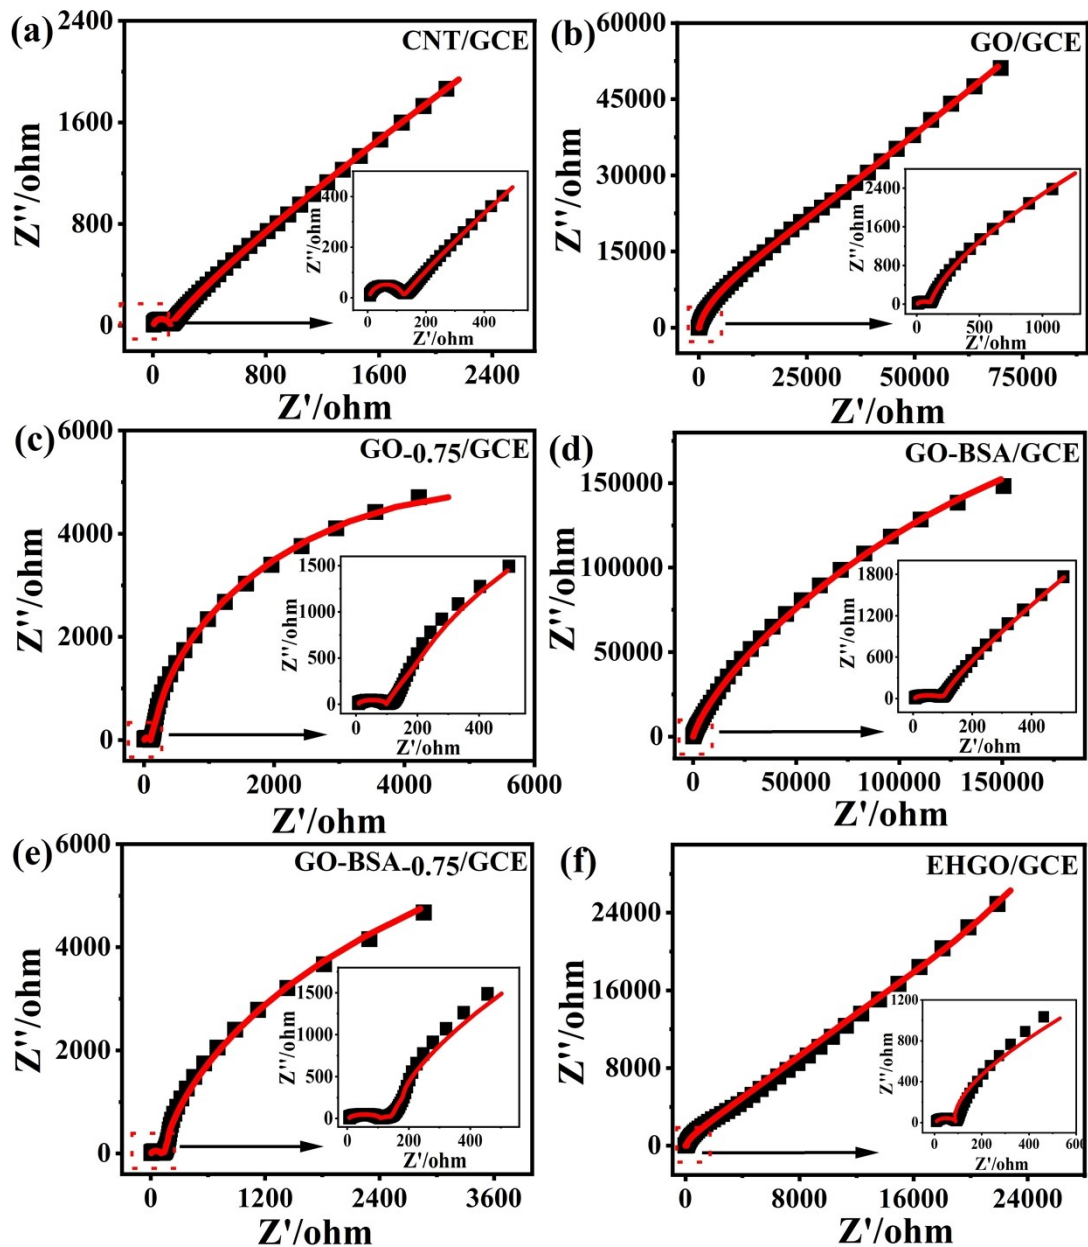

**Fig. S-9** Nyquist diagrams for (a) CNT/GCE, (b) GO/GCE, (c) GO-0.75/GCE, (d) GO-BSA/GCE, (e) GO-BSA-0.75/GCE, (f) EHGO/GCE in 0.1 M KCl solution in the presence of 5 mM  $\text{K}_3\text{Fe}(\text{CN})_6$ . The symbols and solid lines present the experimental and the fitted data, respectively. Inset: The amplified Nyquist diagrams. The frequency range of EIS was from 1 MHz to 0.1 Hz at 0.25V.

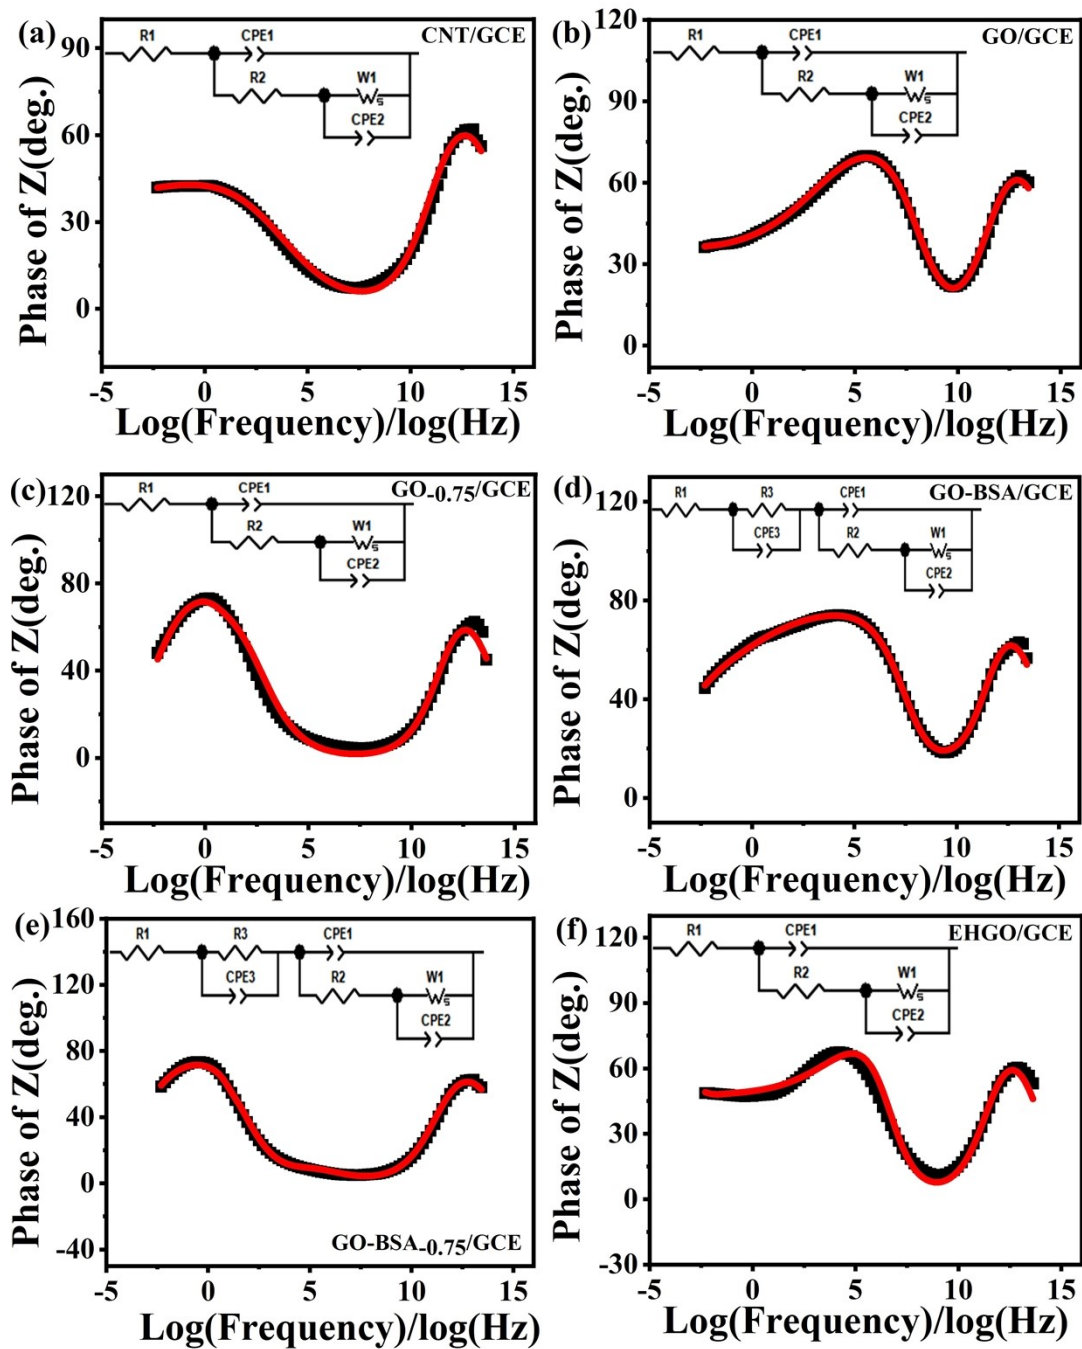

**Fig. S-10** Phase angle diagrams vs log of frequency of Bode plots for (a) CNT/GCE, (b) GO/GCE, (c) GO<sub>0.75</sub>/GCE, (d) GO-BSA/GCE, (e) GO-BSA<sub>0.75</sub>/GCE, (f) EHGO/GCE. Inset: The electrical equivalent circuit.

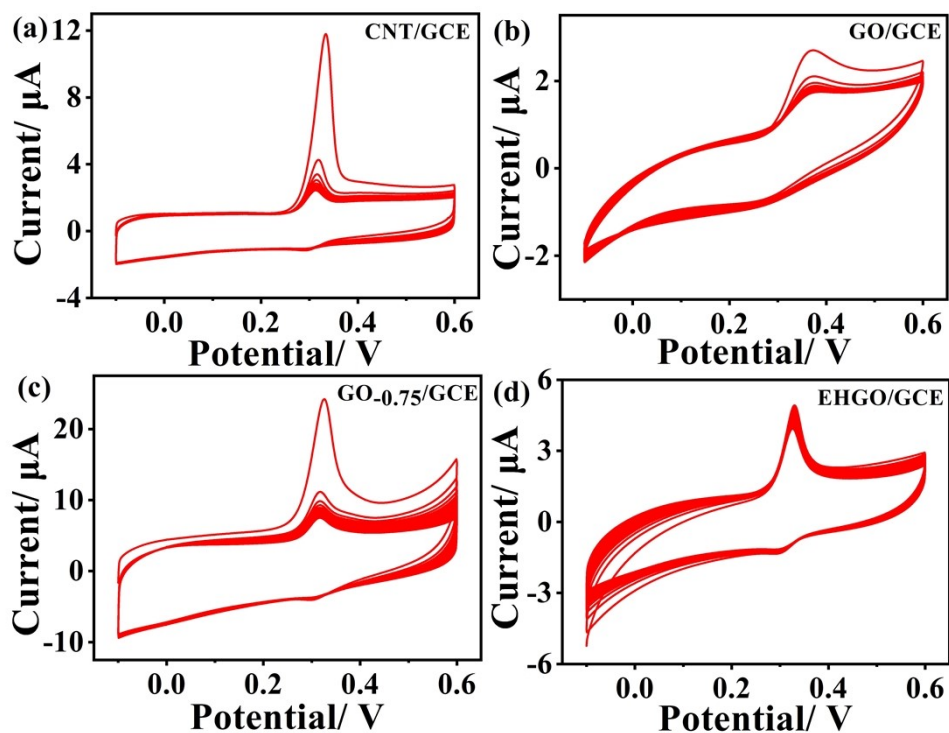

**Fig. S-11** CVs of (a) CNT/GCE, (b) GO/GCE, (c) GO<sub>0.75</sub>/GCE, (d) EHGO/GCE in 0.1 M PBS (pH = 7.0) containing 100 μM UA for 30 cycles at a scan rate of 25 mV s<sup>-1</sup>.

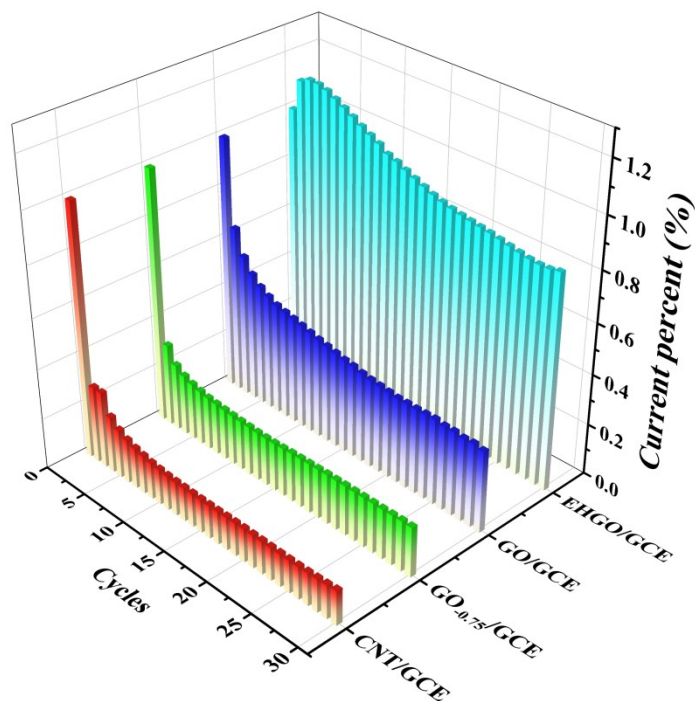

**Fig. S-12** Normalized CV peak current percent of CNT/GCE, GO/GCE, GO<sub>0.75</sub>/GCE, and EHGO/GCE in 0.1 M PBS (pH = 7.0) containing 100 μM UA.



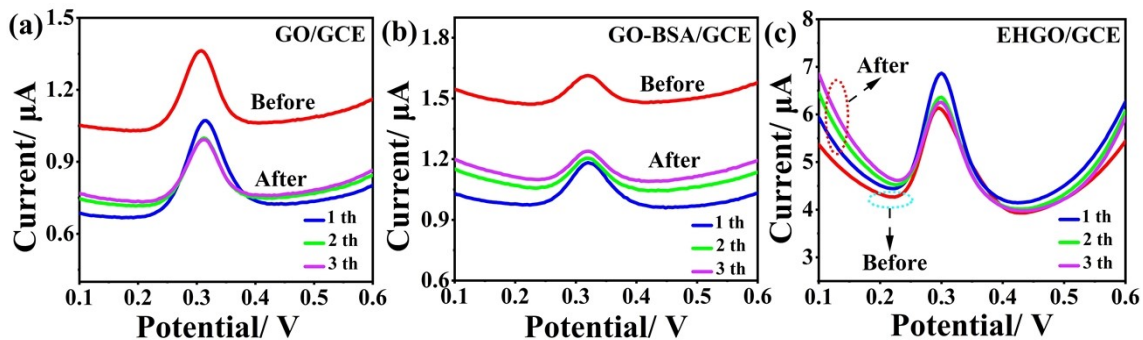

**Fig. S-13** DPV responses of 10  $\mu\text{M}$  UA at (a) GO/GCE, (b) GO-BSA/GCE, and (c) EHGO/GCE before and after immersion in undiluted serum for 1 hour.

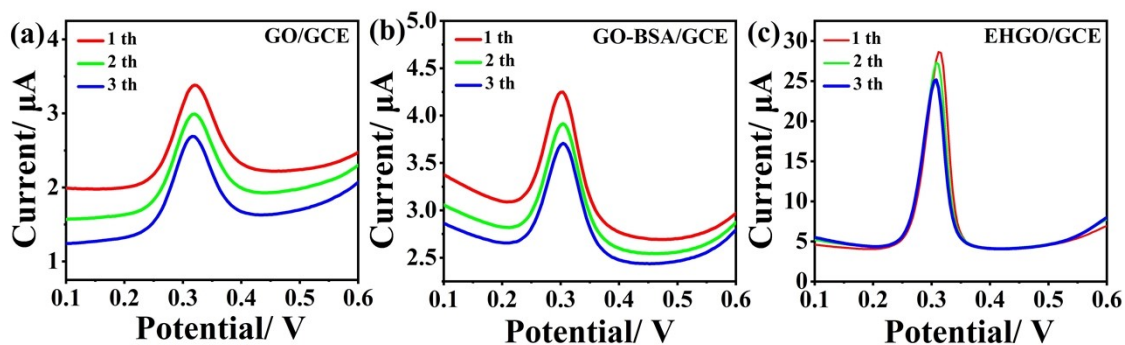

**Fig. S-14** Successive DPV responses of (a) GO/GCE, (b) GO-BSA/GCE, (c) EHGO/GCE in diluted human serum in 0.1 M PBS (pH=7.0). The human serum was diluted two times.

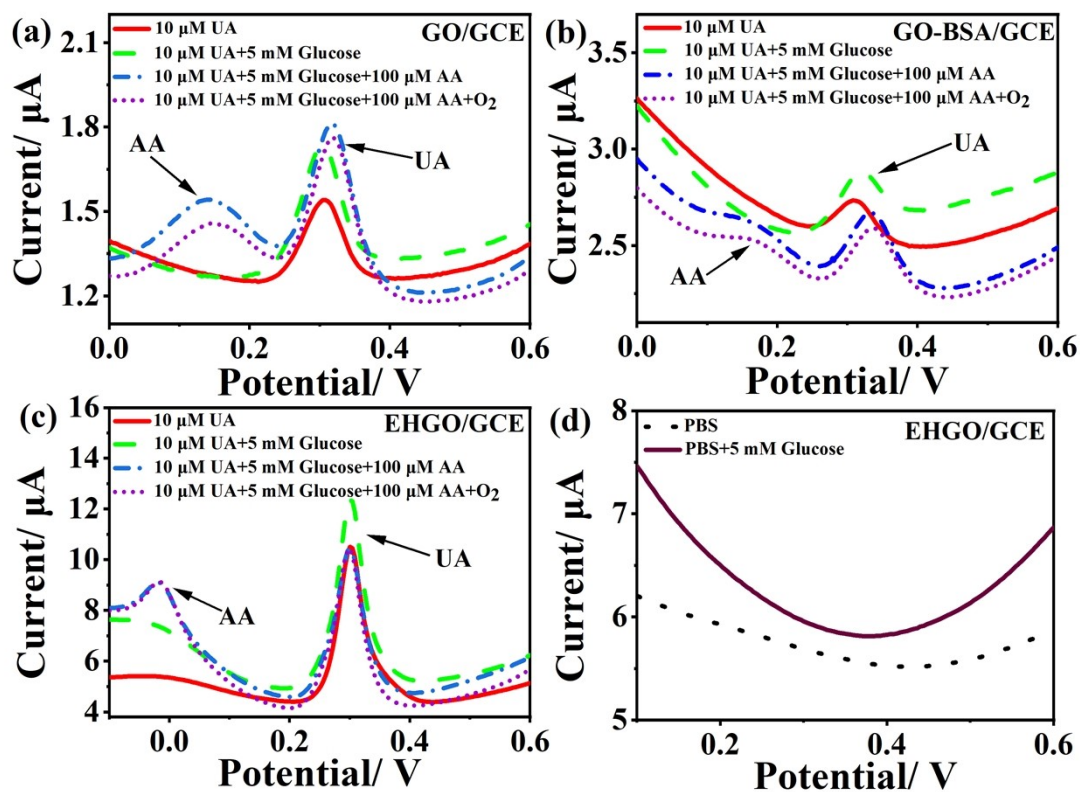

**Fig. S-15** DPV responses of (a) GO/GCE, (b) GO-BSA/GCE, and (c) EHGO/GCE in 0.1 M PBS (pH = 7.0) with 10  $\mu\text{M}$  UA in the presence of 5 mM glucose, 100  $\mu\text{M}$  AA, and saturated  $\text{O}_2$ . (d) DPV responses of EHGO/GCE in the absence (dotted line) and presence (solid line) of 5 mM glucose.

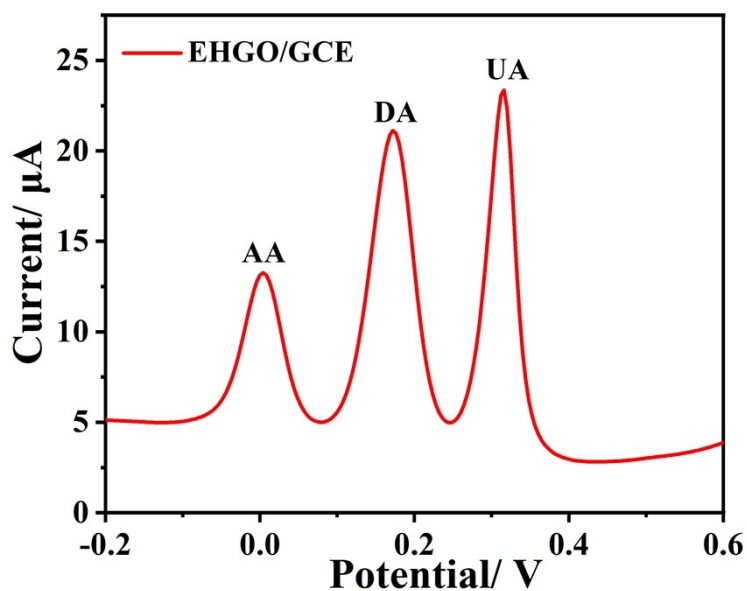

**Fig. S-16** DPV response of EHGO/GCE in the presence of 500  $\mu\text{M}$  AA, 10  $\mu\text{M}$  DA, and 20  $\mu\text{M}$  UA in 0.1 M PBS (pH = 7.0).

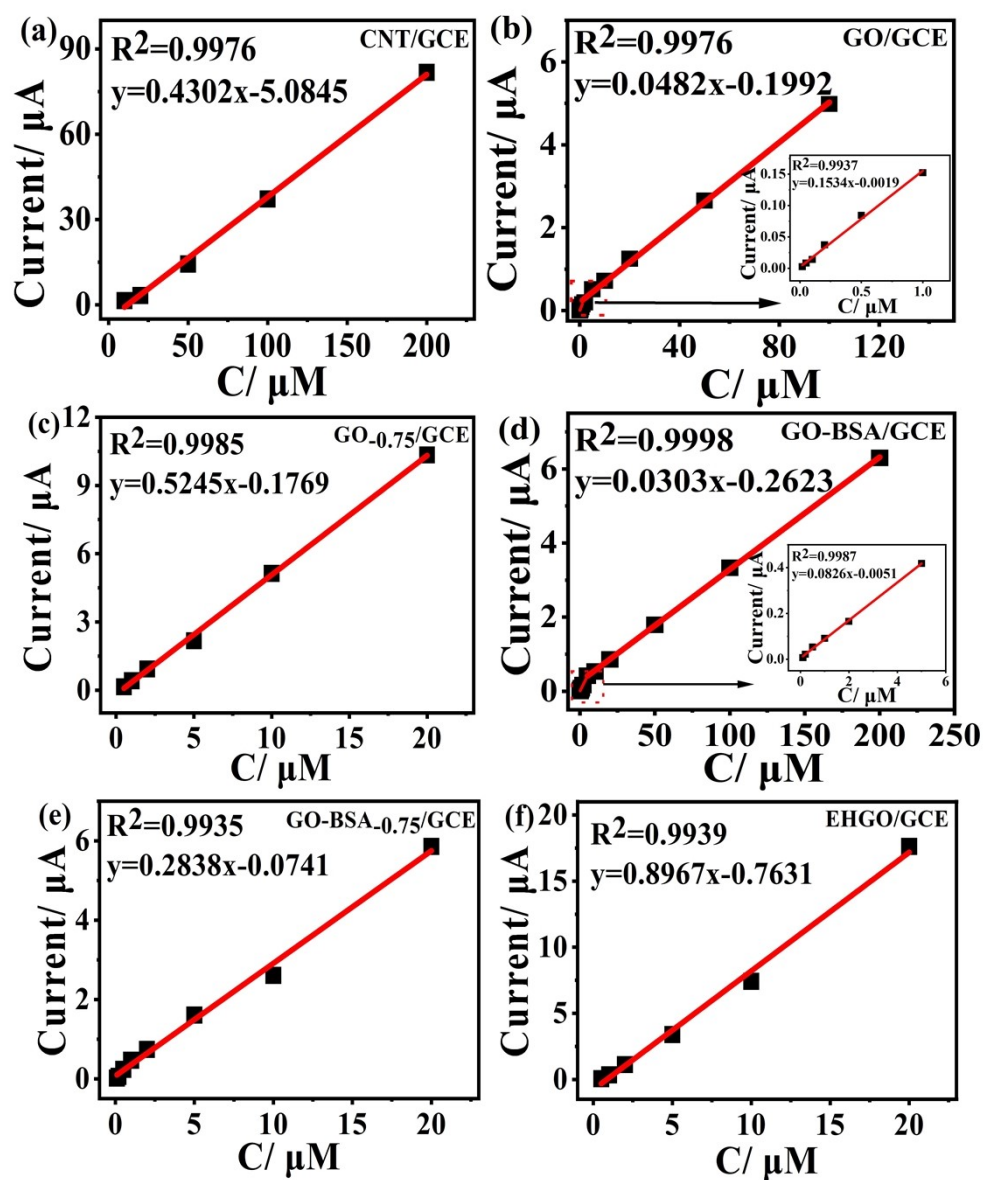

**Fig. S-17** The corresponding linear calibration plot of peak current versus concentration of UA. Inset: The amplified linear calibration plot.

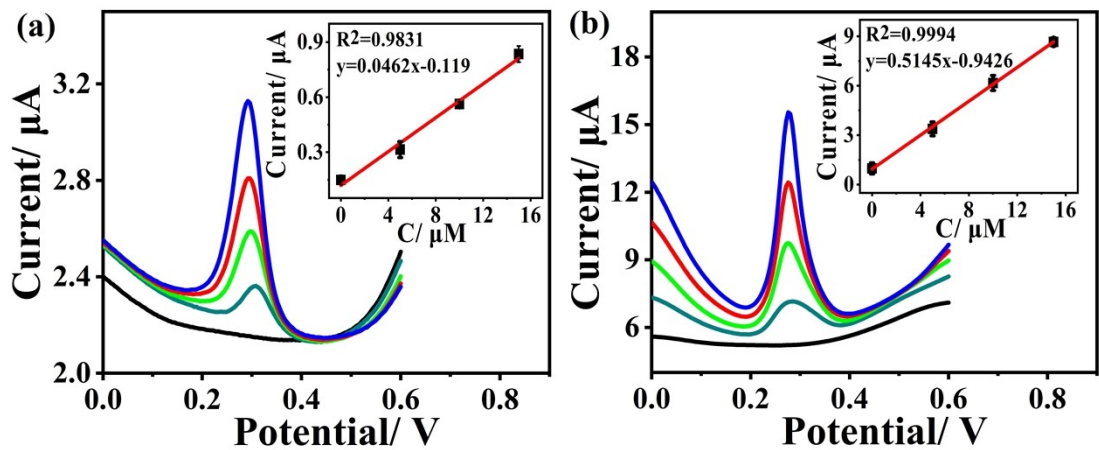

**Fig. S-18** DPV curves of the (a) GO/GCE and (b) EHGO/GCE for different concentrations of UA (From bottom to top: 0; 5; 10; 15  $\mu\text{M}$ ) spiked in diluted human serum in 0.1 M PBS (pH=7.0). Inset: The corresponding calibration curves and error bars. (The human serum was diluted 50-fold.)

**Table S-1** Fitted parameters for C1s XPS spectra.

| Materials          | Parameters    | C1s    |        |        |        |        |                           |
|--------------------|---------------|--------|--------|--------|--------|--------|---------------------------|
|                    |               | C=C    | C-C    | C-S    | C-O    | C=O    | O-C=O                     |
| GO                 | Position (eV) | 284.66 | 285.1  |        | 286.84 | 288.0  | 288.95                    |
|                    | Area          | 21391  | 3112   |        | 23703  | 2982   | 1457                      |
|                    | percentage    | 40.6   | 5.9    |        | 45.0   | 5.7    | 2.8                       |
| EHGO               | Position (eV) | 284.63 | 285.2  |        | 286.76 | 288.0  | 288.95                    |
|                    | Area          | 38399  | 1723   |        | 34091  | 4031   | 1895                      |
|                    | percentage    | 47.9   | 2.2    |        | 42.5   | 5.0    | 2.4                       |
| GO <sub>0.75</sub> | Position (eV) | 284.62 | 285.15 |        | 286.78 | 288.0  | 288.95                    |
|                    | Area          | 38027  | 3171   |        | 27911  | 1349   | 2423                      |
|                    | percentage    | 52.2   | 4.4    |        | 38.3   | 1.9    | 3.2                       |
| GO-BSA             | Position (eV) | 284.33 | 285.36 | 286.01 | 286.95 | 287.84 | 288.91<br>(O-C=O/-CO-NH-) |
|                    | Area          | 40725  | 6769   | 6861   | 6993   | 4862   | 1235                      |
|                    | percentage    | 60.4   | 10.0   | 10.2   | 10.4   | 7.2    | 1.8                       |

**Table S-2** The C/O ratio for C1s XPS spectra.

|                    | Elements (in at %) |       | C/O ratio |
|--------------------|--------------------|-------|-----------|
|                    | C1s                | O1s   |           |
| GO                 | 55.80              | 34.13 | 1.63      |
| GO <sub>0.75</sub> | 71.13              | 23.97 | 2.37      |
| EHGO               | 64.14              | 29.99 | 2.14      |
| GO-BSA             | 71.08              | 18.76 | 3.79      |



**Table S-3** Fitted parameters for O1s XPS spectra.

| <b>Materials</b>    | <b>Parameters</b> | <b>O1s</b>   |            |             |              |                                 |
|---------------------|-------------------|--------------|------------|-------------|--------------|---------------------------------|
|                     |                   | <b>O-C=O</b> | <b>C=O</b> | <b>C-OH</b> | <b>C-O-C</b> | chemisorbed oxygen and/or water |
| GO                  | Position (eV)     | 530.94       | 531.97     | 532.68      | 533.41       | 535.71                          |
|                     | Area              | 22864        | 19643      | 27373       | 14971        | 943                             |
|                     | percentage        | 26.6         | 23.0       | 31.8        | 17.5         | 1.1                             |
| EHGO                | Position (eV)     | 530.93       | 531.95     | 532.67      | 533.41       | 535.55                          |
|                     | Area              | 20467        | 18612      | 533.41      | 10831        | 1525                            |
|                     | percentage        | 20.3         | 18.4       | 49.1        | 10.7         | 1.5                             |
| GO <sub>-0.75</sub> | Position (eV)     | 530.95       | 531.97     | 532.68      | 533.41       | 535.56                          |
|                     | Area              | 10584        | 12952      | 20888       | 17807        | 1910                            |
|                     | percentage        | 16.5         | 20.2       | 32.6        | 27.8         | 2.9                             |
| GO-BSA              | Position (eV)     | 530.94       | 531.94     | 532.67      | 533.41       |                                 |
|                     | Area              | 19981        | 15921      | 10063       | 3391         |                                 |
|                     | percentage        | 40.5         | 32.3       | 20.4        | 6.8          |                                 |

**Table S-4** Fitting parameters for GO, GO<sub>-0.75</sub>, GO-BSA, and EHGO in the Raman spectra.

| Material/Peak |                                    | GO   | EHGO | GO <sub>-0.75</sub> | BSA-GO |
|---------------|------------------------------------|------|------|---------------------|--------|
| D*            | X <sub>c</sub> (cm <sup>-1</sup> ) | 1134 | 1127 | 1144                | 1167   |
|               | W (cm <sup>-1</sup> )              | 300  | 250  | 282                 | 331    |
|               | A (%)                              | 6    | 4    | 6                   | 11     |
| D             | X <sub>c</sub> (cm <sup>-1</sup> ) | 1348 | 1350 | 1347                | 1349   |
|               | W (cm <sup>-1</sup> )              | 144  | 156  | 150                 | 149    |
|               | A (%)                              | 44   | 48   | 47                  | 37     |
| D''           | X <sub>c</sub> (cm <sup>-1</sup> ) | 1500 | 1551 | 1488                | 1514   |
|               | W (cm <sup>-1</sup> )              | 169  | 214  | 116                 | 197    |
|               | A (%)                              | 10   | 16   | 4                   | 16     |
| G             | X <sub>c</sub> (cm <sup>-1</sup> ) | 1578 | 1565 | 1572                | 1578   |
|               | W (cm <sup>-1</sup> )              | 89   | 78   | 97                  | 87     |
|               | A (%)                              | 21   | 9    | 23                  | 15     |
| D'            | X <sub>c</sub> (cm <sup>-1</sup> ) | 1609 | 1603 | 1605                | 1607   |
|               | W (cm <sup>-1</sup> )              | 52   | 58   | 55                  | 57     |
|               | A (%)                              | 5    | 7    | 6                   | 7      |
| G*            | X <sub>c</sub> (cm <sup>-1</sup> ) | 2500 | 2569 | 2509                | 2521   |
|               | W (cm <sup>-1</sup> )              | 43   | 177  | 202                 | 146    |
|               | A (%)                              | 0.1  | 3    | 1                   | 1      |
| 2D            | X <sub>c</sub> (cm <sup>-1</sup> ) | 2695 | 2710 | 2708                | 2669   |
|               | W (cm <sup>-1</sup> )              | 255  | 201  | 267                 | 197    |
|               | A (%)                              | 9    | 4    | 7                   | 4      |
| D+D'          | X <sub>c</sub> (cm <sup>-1</sup> ) | 2935 | 2904 | 2927                | 2900   |
|               | W (cm <sup>-1</sup> )              | 182  | 198  | 176                 | 249    |
|               | A (%)                              | 4    | 5    | 5                   | 6      |
| 2D'           | X <sub>c</sub> (cm <sup>-1</sup> ) | 3179 | 3129 | 3156                | 3165   |
|               | W (cm <sup>-1</sup> )              | 154  | 232  | 167                 | 250    |
|               | A (%)                              | 1    | 3    | 2                   | 2      |

**Table S-5** Max Height intensity for some Raman peaks of GO, GO-0.75, GO-BSA, and EHGO.

| Material   | GO   | EHGO | GO <sub>-0.75</sub> | BSA-GO |      |
|------------|------|------|---------------------|--------|------|
| Max Height | D*   | 567  | 463                 | 530    | 967  |
|            | D    | 7387 | 6899                | 6927   | 6451 |
|            | D''  | 1558 | 2152                | 927    | 2307 |
|            | G    | 5475 | 2829                | 5076   | 4364 |
|            | D'   | 2789 | 3416                | 2649   | 2709 |
|            | G*   | 60   | 367                 | 120    | 212  |
|            | 2D   | 839  | 562                 | 670    | 655  |
|            | D+D' | 620  | 776                 | 689    | 785  |
|            | 2D'  | 231  | 329                 | 281    | 250  |

**Table S-6** Integrated area ratio for some Raman peaks of different GO.

| Material            | $I_D/I_G$ | $I_{D^*}/I_G$ | $A_D/A_G$ | $A_{D^*}/A_G$ |
|---------------------|-----------|---------------|-----------|---------------|
| GO                  | 1.35      | 0.10          | 2.10      | 0.24          |
| EHGO                | 2.44      | 0.16          | 5.30      | 0.80          |
| GO <sub>-0.75</sub> | 1.36      | 0.11          | 2.07      | 0.26          |
| BSA-GO              | 1.48      | 0.22          | 2.47      | 0.39          |

**Table S-7** Fitted parameters for EIS of different electrodes.

| <b>Electrodes</b>                | <b>R1</b> | <b>R2</b> | <b>R3</b> | <b>W1-R</b> | <b>W1-T</b> | <b>W1-P</b> | <b>CPE1-T</b> | <b>CPE1-P</b> | <b>CPE2-T</b> | <b>CPE2-P</b> | <b>CPE3-T</b> | <b>CPE3-P</b> |
|----------------------------------|-----------|-----------|-----------|-------------|-------------|-------------|---------------|---------------|---------------|---------------|---------------|---------------|
| <b>CNT/GCE</b>                   | 5.776     | 115.6     |           | 56524       | 1550        | 0.3524      | 5.5788E-8     | 0.93121       | 2.2198E-4     | 0.64281       |               |               |
| <b>GO/GCE</b>                    | 6.535     | 109.5     |           | 293100      | 36.74       | 0.38336     | 2.3555E-8     | 0.97156       | 7.2397E-7     | 0.94851       |               |               |
| <b>GO<sub>0.75</sub>/GCE</b>     | 8.291     | 90.0      |           | 10900       | 0.46841     | 0.58        | 1.6648E-8     | 1.014         | 1.5696E-4     | 0.9           |               |               |
| <b>GO-BSA/GCE</b>                | 5.12      | 60.5      | 63.98     | 649290      | 11.23       | 0.31039     | 2.6731E-6     | 0.75595       | 7.8916E-7     | 0.9718        | 1.5856E-8     | 1.039         |
| <b>GO-BSA<sub>0.75</sub>/GCE</b> | 5.657     | 53.57     | 68.49     | 16249       | 0.45395     | 0.73622     | 9.8793E-6     | 0.6705        | 2.3443E-4     | 0.88004       | 9.544E-9      | 1.07          |
| <b>RHGO</b>                      | 7.87      | 83.74     |           | 119220      | 16.1        | 0.52752     | 1.4885E-8     | 1.025         | 6.0418E-7     | 1.16          |               |               |

**Table S-8** The linear range and detection limit of different electrodes.

| Electrode                    | Linear range<br>( $\mu\text{M}$ ) | Detection Limit<br>( $\mu\text{M}$ ) |
|------------------------------|-----------------------------------|--------------------------------------|
| CNT/GCE                      | 10-200                            | 0.2                                  |
| GO/GCE                       | 0.2-1/1-100                       | 0.02                                 |
| GO <sub>-0.75</sub> /GCE     | 0.5-20                            | 0.5                                  |
| GO-BSA/GCE                   | 0.1-10/10-200                     | 0.1                                  |
| GO-BSA <sub>-0.75</sub> /GCE | 0.1-20                            | 0.1                                  |
| EHGO/GCE                     | 0.5-20                            | 0.2                                  |



**Table S-9** Comparison of different modified electrodes for electrochemical detection of UA.

| Electrode material                         | Electrochemical Method | pH  | Linear range ( $\mu\text{M}$ ) | Detection limit ( $\mu\text{M}$ ) | Ref. |
|--------------------------------------------|------------------------|-----|--------------------------------|-----------------------------------|------|
| CNP                                        | DPV                    | 7.0 | 25-2500                        | 0.2                               | [1]  |
| MC-GO-Fe <sub>3</sub> O <sub>4</sub>       | DPV                    | 7.0 | 0.5-140                        | 0.17                              | [2]  |
| Ni@CNRs                                    | DPV                    | 7.0 | 0.5-30/<br>35-100              | 0.166                             | [3]  |
| CoPc/GQDs                                  | DPV                    | 7.0 | 10.76-3003                     | 0.145                             | [4]  |
| COF/La <sub>2</sub> O <sub>3</sub> /MWCNTS | DPV                    | 7.0 | 0.4-450                        | 0.024                             | [5]  |
| g-C <sub>3</sub> N <sub>4</sub> /MWNTs/GO  | DPV                    | 7.0 | 4-200                          | 1.36                              | [6]  |
| ERGO/ZnO                                   | DPV                    | 7.0 | 1-400                          | 0.45                              | [7]  |
| GQDs                                       | DPV                    | 6.5 | 10-1000                        | 0.107                             | [8]  |
| N-rGO                                      | DPV                    | 7.0 | 1-30                           | 0.2                               | [9]  |
| GO/AuNR                                    | DPV                    | 7.0 | 10-90                          | 0.4                               | [10] |
| Co <sub>3</sub> O <sub>4</sub> -ERGO       | DPV                    | 7.0 | 5-500                          | 1.5                               | [11] |
| CNT                                        | DPV                    | 7.0 | 10-200                         | 0.2                               |      |
| GO-BSA                                     | DPV                    | 7.0 | 0.1-10/10-200                  | 0.1                               |      |
| GO-BSA <sub>-0.75</sub>                    | DPV                    | 7.0 | 0.1-20                         | 0.1                               |      |
| GO <sub>-0.75</sub>                        | DPV                    | 7.0 | 0.5-20                         | 0.5                               |      |
| GO                                         | DPV                    | 7.0 | 0.2-1/1-100                    | 0.02                              |      |
| EHGO                                       | DPV                    | 7.0 | 0.5-20                         | 0.2                               |      |

**This work**

1. CNP: carbon material containing nitrogen and phosphorus.<sup>1</sup>
2. MC-GO-Fe<sub>3</sub>O<sub>4</sub>: methylcellulose/graphene oxide/iron oxide nano hydrogel.<sup>2</sup>
3. Ni@CNRs: Nickel nanoparticles loaded with carbon nanorods.<sup>3</sup>
4. CoPc/GQDs: cobalt phthalocyanine anchored with graphene quantum dots.<sup>4</sup>
5. COF/La<sub>2</sub>O<sub>3</sub>/MWCNTS: covalent organic framework and lanthanum oxide and multi-wall carbon nanotubes.<sup>5</sup>
6. g-C<sub>3</sub>N<sub>4</sub>/MWNTs/GO: Graphite carbon nitride and multi-walled carbon nanotubes and Graphene oxide.<sup>6</sup>
7. ERGO/ZnO: Electrochemically reduced graphene oxide/zincoxide.<sup>7</sup>

8. GQDs: graphene quantum dots.<sup>8</sup>

9. N-rGO: Nitrogen-doped reduced graphene oxide.<sup>9</sup>

10. GO/AuNR: graphene oxide and gold nanorod.<sup>10</sup>

11. Co<sub>3</sub>O<sub>4</sub>-ERGO: Co<sub>3</sub>O<sub>4</sub> nanoparticles and electrochemically reduced graphene oxide.<sup>11</sup>

## References

- 1 Y. Huang, Y. Zang, S. Ruan, Y. Zhang, P. Gao, W. Yin, C. Hou, D. Huo, M. Yang and H.-b. Fa, *Microchem. J.*, 2021, 165, 106152.
- 2 E. Sohoulı, E. M. Khosrowshahi, P. Radi, E. Naghian, M. Rahimi-Nasrabadi and F. Ahmadi, *J. Electroanal. Chem.*, 2020, 877, 114503.
- 3 B.-T. Liu, X.-Q. Cai, Y.-H. Luo, K. Zhu, Q.-Y. Zhang, T.-T. Hu, T.-T. Sang, C.-Y. Zhang and D.-E. Zhang, *Microchem. J.*, 2021, 171, 106823.
- 4 B. Wu, M. Li, R. Ramachandran, G. Niu, M. Zhang, C. Zhao, Z. Xu and F. Wang, *Adv. Mater. Interfaces*, 2023, 10, 2200738.
- 5 Z. Pan, H. Guo, L. Sun, B. Liu, Y. Chen, T. Zhang, M. Wang, L. Peng and W. Yang, *Colloids Surf. Physicochem. Eng. Aspects*, 2022, 635, 128083.
- 6 H. Wang, A. Xie, S. Li, J. Wang, K. Chen, Z. Su, N. Song and S. Luo, *Anal. Chim. Acta*, 2022, 1211, 339907.
- 7 M. Eryiđit, B. K. Urhan, H. Ö. Dođan, T. Ö. Özer and D. Ü, *IEEE Sens. J.*, 2022, 22, 5555-5561.
- 8 C. Zhao, J. Xiao, T. Liu, H. Shi, Q. Li and Z. J. I. J. E. S. Ruan, *Int. J. Electrochem. Sci.*, 2022, 17, 2.
- 9 A. Elangovan, K. Sudha, A. Jeevika, C. Bhuvaneshwari, P. Kalimuthu and V. Balakumar, *Colloids Surf. Physicochem. Eng. Aspects*, 2020, 602, 125050.
- 10 H. Safitri, W. T. Wahyuni, E. Rohaeti, M. Khalil and F. J. R. a. Marken, *RSC Adv.*, 2022, 12, 25269-25278.
- 11 G. Turkkın, S. Z. Bas, K. Atacan and M. Ozmen, *Anal. Methods*, 2022, 14, 67-75.
